# Supplementary material
Source: PubMed Central journal article supplement (PMC5885269)
Supplement: jamaoncol-e174695-s001.pdf [file jamaoncol-e174695-s001.pdf]

## Supplementary Online Content

Fathi AT, DiNardo CD, Kline I, et al; AG221-C-001 Study Investigators. Differentiation syndrome associated with enasidenib, a selective inhibitor of mutant isocitrate dehydrogenase 2: analysis of a phase 1/2 study. *JAMA Oncol*. Published January 18, 2018. doi:10.1001/jamaoncol.2017.4695

**eAppendix.** List of IECs/IRBs for AG221-C-001

**eTable 1.** MedDRA Terms Searched in the Safety Database for Assessment of Potential IDH-DS

**eTable 2.** Baseline Characteristics

**eFigure 1.** Case 1: Clinical and Laboratory Profiles for a Responding Patient With Enasidenib-Induced IDH-DS

**eFigure 2.** Case 2: Clinical and Laboratory Profiles for a Patient With Enasidenib-Induced IDH-DS With Sustained Stable Disease

This supplementary material has been provided by the authors to give readers additional information about their work.

**eAppendix. List of IECs/IRBs for AG221-C-001**

**Phase I**

| <b>Site No.</b> | <b>Name/Address of IEC/IRB</b>                                                                                                                                                                                                                                                                           |
|-----------------|----------------------------------------------------------------------------------------------------------------------------------------------------------------------------------------------------------------------------------------------------------------------------------------------------------|
| 101             | IntegReview Ethical Review Board 3851 S. Capital of Texas Highway Suite 320<br>Austin, TX 78704 USA<br><br>Previous address:<br>3001 S. Lamar Blvd. Suite 210 Austin, TX 78704 USA                                                                                                                       |
| 102             | IntegReview Ethical Review Board 3851 S. Capital of Texas Highway Suite 320<br>Austin, TX 78704 USA<br><br>Previous address:<br>3001 S. Lamar Blvd. Suite 210 Austin, TX 78704 USA                                                                                                                       |
| 103 / 900       | Office for Human Research Studies Dana Farber Cancer Institute Boston, MA<br>02215 USA                                                                                                                                                                                                                   |
| 104             | Memorial Sloan Kettering Cancer Center Institutional Review Board<br>1275 York Avenue<br>New York, NY 10065 USA                                                                                                                                                                                          |
| 105             | Western Institutional Review Board (WIRB)<br>1019 39 <sup>th</sup> Ave SE Suite 120 Puyallup, WA 98374-2115 USA                                                                                                                                                                                          |
| 106             | UT Southwestern Institutional Review Board<br>5323 Harry Hines Blvd. Dallas, TX 75390-8843 USA                                                                                                                                                                                                           |
| 107             | Stanford Institutional Review Board (IRB)<br>3000 El Camino Real<br>Five Pala Alto Square, 4 <sup>th</sup> Floor Palo Alto, CA 94306 USA<br><br>Previous address:<br>Stanford University Administrative Panel on Human Subjects in Medical Research<br>1501 S. California Avenue Palo Alto, CA 94303 USA |

| <b>Site No.</b> | <b>Name/Address of IEC/IRB</b>                                                                                                                                                                                  |
|-----------------|-----------------------------------------------------------------------------------------------------------------------------------------------------------------------------------------------------------------|
| 108             | University of Miami Institutional Review Board<br>1400 NW 10 <sup>th</sup> Avenue Suite 1200A<br>Miami, FL 33136 USA<br><br>Previous Address: 1500 NW 12 <sup>th</sup> Avenue Suite 1002<br>Miami, FL 33136 USA |
| 109             | Weill Cornell Medical<br>College Institutional Review Board 407 East 61 <sup>st</sup> Street<br>RR110<br>New York, NY 10065 USA                                                                                 |
| 110             | Northwestern University Institutional Review Board<br>750 N. Lake Shore Drive – 7 <sup>th</sup> Floor Chicago, IL 60611 USA                                                                                     |
| 111             | The University of Texas MD Anderson Cancer Center<br>Institutional Review Board (FWA 363) 7007 Bertner Avenue, Unit 1637 Houston,<br>TX 77030 USA                                                               |
| 112             | Cleveland Clinic IRB 9500 Euclid Avenue<br>Cleveland, OH 44195 USA                                                                                                                                              |
| 117             | Chesapeake IRB<br>6940 Columbia Gateway Drive Suite 110<br>Columbia, MD 21046 USA<br><br>Previous: Liberty IRB<br>1450 S. Woodland Boulevard Suite 300A<br>DeLand, FL 32720 USA                                 |
| 118             | Western Institutional Review Board (WIRB)<br>1019 39 <sup>th</sup> Ave SE Suite 120 Puyallup, WA 98374 USA                                                                                                      |
| 201             | Comité de Protection des Personnes - Ile- de-France 3<br>Hôpital Tarnier-Cochin 89 rue d'Assas<br>Paris FRANCE 75006                                                                                            |
| 203             | Comité de Protection des Personnes - Ile- de-France 3<br>Hôpital Tarnier-Cochin 89 rue d'Assas<br>Paris FRANCE 75006                                                                                            |

## Phase II

| Site No.  | Name/Address of IEC/IRB                                                                                                                                                                                                 |
|-----------|-------------------------------------------------------------------------------------------------------------------------------------------------------------------------------------------------------------------------|
| 101       | <p>IntegReview Ethical Review Board 3851 S. Capital of Texas Highway Suite 320<br/>Austin, TX 78704 USA</p> <p>Previous address:<br/>3001 S. Lamar Blvd. Suite 210 Austin, TX 78704 USA</p>                             |
| 102       | <p>IntegReview Ethical Review Board 3851 S. Capital of Texas Highway Suite 320<br/>Austin, TX 78704 USA</p> <p>Previous address:<br/>3001 S. Lamar Blvd. Suite 210 Austin, TX 78704 USA</p>                             |
| 103 / 900 | <p>Office for Human Research Studies Dana Farber Cancer Institute Boston, MA<br/>02215 USA</p>                                                                                                                          |
| 104       | <p>Memorial Sloan Kettering Cancer Center Institutional Review Board<br/>1275 York Avenue<br/>New York, NY 10065 USA</p>                                                                                                |
| 105       | <p>Western Institutional Review Board (WIRB)<br/>1019 39<sup>th</sup> Ave SE Suite 120 Puyallup, WA 98374-2115 USA</p>                                                                                                  |
| 106       | <p>UT Southwestern Institutional Review Board<br/>5323 Harry Hines Blvd. Dallas, TX 75390-8843 USA</p>                                                                                                                  |
| 108       | <p>University of Miami Institutional Review Board<br/>1400 NW 10<sup>th</sup> Avenue Suite 1200A<br/>Miami, FL 33136 USA</p> <p>Previous Address: 1500 NW 12<sup>th</sup> Avenue Suite 1002<br/>Miami, FL 33136 USA</p> |

|     |                                                                                                                                                                                                                                                                    |
|-----|--------------------------------------------------------------------------------------------------------------------------------------------------------------------------------------------------------------------------------------------------------------------|
| 109 | <p>Weill Cornell Medical College Institutional Review Board 1300 York Avenue, Box 89 New York, NY 10065</p> <p>Previous address: Weill Cornell Medical College Institutional Review Board<br/>407 East 61<sup>st</sup> Street RR110<br/>New York, NY 10065 USA</p> |
| 110 | <p>Northwestern University Institutional Review Board<br/>750 N. Lake Shore Drive – 7<sup>th</sup> Floor Chicago, IL 60611 USA</p>                                                                                                                                 |
| 111 | <p>The University of Texas MD Anderson Cancer Center<br/>Institutional Review Board (FWA 363) 7007 Bertner Avenue, Unit 1637 Houston, TX 77030 USA</p>                                                                                                             |
| 112 | <p>Cleveland Clinic IRB 9500 Euclid Avenue<br/>Cleveland, OH 44195 USA</p>                                                                                                                                                                                         |
| 113 | <p>Western Institutional Review Board (WIRB)<br/>1019 39<sup>th</sup> Ave SE Suite 120 Puyallup, WA 98374 USA</p>                                                                                                                                                  |
| 114 | <p>Washington University in St. Louis 660 S. Euclid Ave<br/>Box 8089<br/>St. Louis, MO 63110 USA</p>                                                                                                                                                               |
| 116 | <p>OHSU Institutional Review Board 3181 SW Sam Jackson Park Road, L106-RI<br/>Portland, OR 97239 USA</p>                                                                                                                                                           |
| 117 | <p>Chesapeake IRB<br/>6940 Columbia Gateway Drive Suite 110<br/>Columbia, MD 21046 USA</p> <p>Previous: Liberty IRB<br/>1450 S. Woodland Boulevard Suite 300A<br/>DeLand, FL 32720 USA</p>                                                                         |
| 118 | <p>Western Institutional Review Board (WIRB)<br/>1019 39<sup>th</sup> Ave SE Suite 120 Puyallup, WA 98374 USA</p>                                                                                                                                                  |
| 201 | <p>Comité de Protection des Personnes - Ile- de-France 3<br/>Hôpital Tarnier-Cochin 89 rue d’Assas<br/>Paris FRANCE 75006</p>                                                                                                                                      |

|     |                                                                                                                      |
|-----|----------------------------------------------------------------------------------------------------------------------|
| 203 | Comité de Protection des Personnes - Ile- de-France 3<br>Hôpital Tarnier-Cochin 89 rue d'Assas<br>Paris FRANCE 75006 |
| 205 | Comité de Protection des Personnes - Ile- de-France 3<br>Hôpital Tarnier-Cochin 89 rue d'Assas<br>Paris FRANCE 75006 |

**eTable 1. MedDRA Terms Searched in the Safety Database for Assessment of Potential IDH-DS**

| <b>Clinical manifestation</b>                                                                            | <b>MedDRA terms</b>                                                                                                |
|----------------------------------------------------------------------------------------------------------|--------------------------------------------------------------------------------------------------------------------|
| <b>MedDRA screening criteria: Any reports</b>                                                            |                                                                                                                    |
| <b>Differentiation Syndrome</b>                                                                          | APL differentiation syndrome or retinoic acid syndrome (depending on MedDRA version)                               |
| <b>Pneumonia</b>                                                                                         | Lower respiratory tract and lung infections<br>Parenchymal lung disorders                                          |
| <b>Dyspnea and Hypoxia</b>                                                                               | Acute central respiratory depression<br>Respiratory failure                                                        |
| <b>Pleural or Pericardial Effusion</b>                                                                   | Pericardial effusion<br>Pleural effusion                                                                           |
| <b>Pulmonary Edema</b>                                                                                   | Pulmonary edema                                                                                                    |
| <b>Pulmonary Infiltrates</b>                                                                             | Parenchymal lung disorder                                                                                          |
| <b>DIC</b>                                                                                               | Disseminated intravascular coagulation                                                                             |
| <b>MedDRA screening criteria: 2 or more of the events below, occurring within ±15 days of each other</b> |                                                                                                                    |
| <b>Fever</b>                                                                                             | Pyrexia                                                                                                            |
| <b>Leukocytosis</b>                                                                                      | Leukocytosis<br>WBC count increased                                                                                |
| <b>Fluid Retention</b>                                                                                   | Total Fluid Volume increased<br>Edema NEC<br>Hemodynamic edema<br>Effusions and fluid overload<br>Pulmonary edemas |
| <b>Rash</b>                                                                                              | Rashes, eruptions and exanthems NEC                                                                                |
| <b>Pain</b>                                                                                              | Bone Pain<br>Pain in extremity<br>Pelvic pain<br>Spinal pain<br>Arthralgia                                         |
| <b>Lymphadenopathy</b>                                                                                   | Lymphadenopathy                                                                                                    |
| <b>Renal insufficiency</b>                                                                               | SQ Acute renal failure                                                                                             |

**eTable 2. Baseline Characteristics**

| Characteristic                                       | IDH-DS<br>(n=33 <sup>a</sup> ) | No IDH-DS<br>(n=248 <sup>b</sup> ) | P value |
|------------------------------------------------------|--------------------------------|------------------------------------|---------|
| Age (years), median (range)                          | 70.0 (38-80)                   | 68.0 (19-100)                      | 0.908   |
| Age < 65, n (%)                                      | 12 (36)                        | 93 (38)                            | 0.417   |
| Age ≥ 65 - < 75, n (%)                               | 16 (48)                        | 94 (38)                            |         |
| Age ≥ 75, n (%)                                      | 5 (15)                         | 61 (25)                            |         |
| Sex, n (%)                                           |                                |                                    | 0.465   |
| Male                                                 | 20 (61)                        | 133 (54)                           |         |
| Female                                               | 13 (39)                        | 115 (46)                           |         |
| ECOG PS, n (%)                                       |                                |                                    | 0.410   |
| 0                                                    | 9 (27)                         | 54 (22)                            |         |
| 1                                                    | 21 (64)                        | 149 (60)                           |         |
| 2                                                    | 3 (9)                          | 44 (18)                            |         |
| IDH2 mutation site, n (%)                            |                                |                                    | 1.000   |
| R140                                                 | 25 (76)                        | 183 (74)                           |         |
| R172                                                 | 8 (24)                         | 62 (25)                            |         |
| Prior anti-cancer regimens, median (range)           | 1.0 (1-4)                      | 2.0 (1-14)                         | 0.048   |
| 1 prior anti-cancer regimen, n (%)                   | 19 (58)                        | 104 (42)                           | 0.225   |
| 2 to 5 prior anti-cancer regimens, n (%)             | 14 (42)                        | 141 (57)                           |         |
| > 5 prior anti-cancer regimens, n (%)                | 0                              | 3 (1)                              |         |
| Prior MDS, n (%)                                     |                                |                                    | 0.650   |
| Yes                                                  | 8 (24)                         | 51 (21)                            |         |
| No                                                   | 25 (76)                        | 197 (79)                           |         |
| Hemoglobin (g/dL), median (range)                    | 9.2 (7.0-11.2)                 | 9.0 (6.9-15.6)                     | 0.600   |
| ≤ 10 g/dL, n (%)                                     | 29 (88)                        | 181 (73)                           | 0.086   |
| > 10 g/dL, n (%)                                     | 4 (12)                         | 66 (27)                            |         |
| Platelet count (x10 <sup>9</sup> /L), median (range) | 41.0 (7-372)                   | 39.0 (1-1288)                      | 0.700   |
| < 10 x10 <sup>9</sup> /L, n (%)                      | 2 (6)                          | 9 (4)                              | 0.718   |
| 10 - < 40 x10 <sup>9</sup> /L, n (%)                 | 14 (42)                        | 115 (46)                           |         |
| ≥ 40 x10 <sup>9</sup> /L, n (%)                      | 17 (51)                        | 123 (50)                           |         |
| WBC count (x10 <sup>9</sup> /L), median (range)      | 3.0 (0.5-32.0)                 | 2.2 (0.2-93.8)                     | 0.342   |
| < 2 x10 <sup>9</sup> /L, n (%)                       | 11 (33)                        | 108 (44)                           | 0.527   |
| 2 to < 5 x10 <sup>9</sup> /L, n (%)                  | 8 (24)                         | 60 (24)                            |         |
| 5 to < 10 x10 <sup>9</sup> /L, n (%)                 | 5 (15)                         | 24 (10)                            |         |
| 10 to < 50 x10 <sup>9</sup> /L, n (%)                | 9 (27)                         | 48 (19)                            |         |
| ≥ 50 x10 <sup>9</sup> /L, n (%)                      | 0                              | 7 (3)                              |         |



| Characteristic                                | IDH-DS<br>(n=33 <sup>a</sup> ) | No IDH-DS<br>(n=248 <sup>a</sup> ) | P value |
|-----------------------------------------------|--------------------------------|------------------------------------|---------|
| Serum creatinine (mg/dL), median (range)      | 0.9 (0.4-1.4)                  | 0.8 (0.3-1.9)                      | 0.549   |
| ≤ 1.4 mg/dL, n (%)                            | 32 (97)                        | 238 (96)                           | 1.000   |
| > 1.4 mg/dL, n (%)                            | 1 (3)                          | 9 (4%)                             |         |
| Creatinine clearance (mL/min), median (range) | 79 (38-181)                    | 81 (26-237)                        | 0.890   |
| < 40 mL/min, n (%)                            | 1 (3)                          | 8 (3)                              | 1.000   |
| ≥ 40 mL/min, n (%)                            | 32 (97)                        | 239 (96)                           |         |
| LDH (U/L), median (range)                     | 275 (84-1153)                  | 257 (57-5938)                      | 0.906   |
| ≤ 1 x ULN, n (%)                              | 16 (48)                        | 158 (64)                           | 0.090   |
| > 1 x ULN, n (%)                              | 17 (51)                        | 89 (36)                            |         |
| Albumin (g/dL), median (range)                | 3.6 (2.4-4.6)                  | 3.7 (2.1-35.0)                     | 0.706   |
| ≤ 3.5 g/dL, n (%)                             | 14 (42)                        | 95 (38)                            |         |
| > 3.5 g/dL, n (%)                             | 19 (58)                        | 152 (61)                           |         |
| Peripheral blasts (%)                         | n=22                           | n=210                              |         |
| Median (range)                                | 31 (0-88)                      | 13 (0-98)                          | 0.054   |
| ≤ 50%, n (%)                                  | 13 (39)                        | 153 (62)                           | 0.214   |
| > 50%, n (%)                                  | 9 (27)                         | 57 (23)                            |         |
| ≤ 70%, n (%)                                  | 18 (55)                        | 162 (65)                           | 0.791   |
| > 70%, n (%)                                  | 4 (12)                         | 48 (19)                            |         |
| Bone marrow blasts (%), median (range)        | 53 (15 ,97)                    | 46 (0-98)                          | 0.204   |
| < 20%, n (%)                                  | 2 (6%)                         | 55 (22%)                           | 0.043   |
| 20%-50%, n (%)                                | 14 (42%)                       | 69 (27%)                           |         |
| > 50%, n (%)                                  | 16 (48%)                       | 115 (46%)                          |         |
| Cytogenetic risk status, n (%)                | [n=24]                         | [n=187]                            |         |
| Intermediate-Risk                             | 16 (67)                        | 126 (67)                           | 1.000   |
| Poor-Risk                                     | 8 (33)                         | 61 (33)                            |         |

<sup>a</sup>Data were not available for all patients for some variables, hence proportions do not add to 100% in some cases. Baseline characteristics of patients who did, and who did not, experience IDH-DS were compared by Wilcoxon Mann-Whitney test (continuous variables) or Fisher's Exact test (categorical variables). ECOG PS, Eastern Cooperative Oncology Group performance status; IDH-DS, IDH-inhibitor-associated differentiation syndrome; LDH, lactate dehydrogenase; MDS, myelodysplastic syndromes; ULN, upper limit of normal; WBC, white blood cell

**eFigure 1. Case 1: Clinical and Laboratory Profiles for a Responding Patient With Enasidenib-Induced IDH-DS**

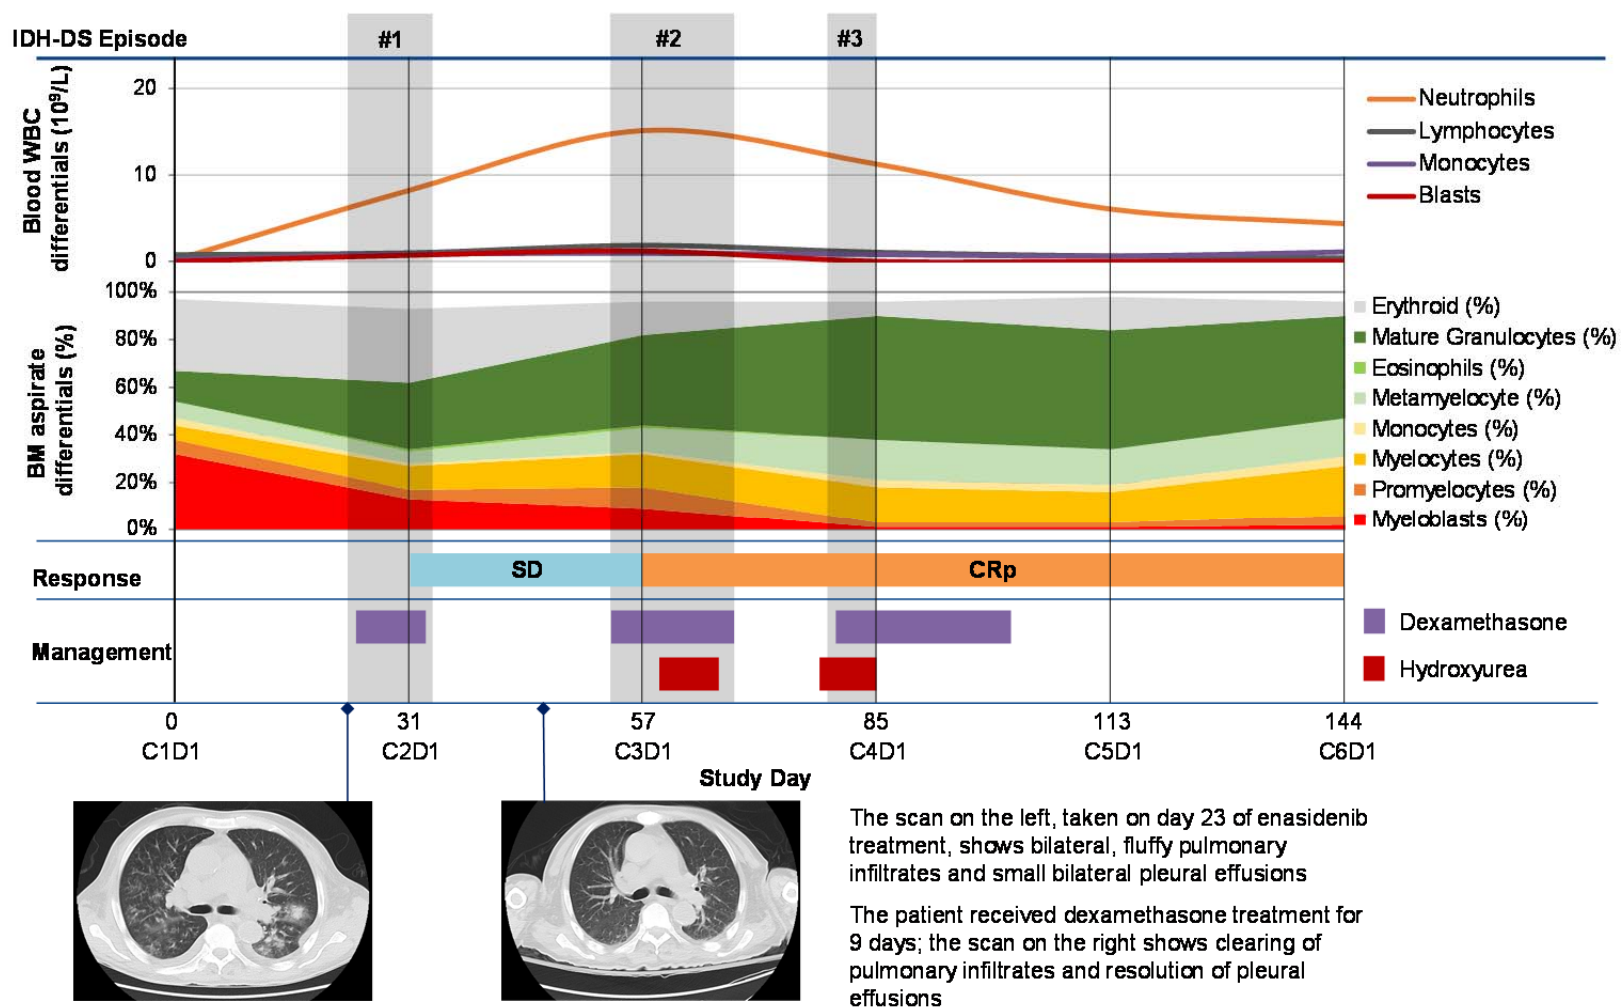

**Case 1:** A 72-year-old male with AML secondary to MDS, and refractory to intensive chemotherapy, received enasidenib 100-mg daily and experienced 3 separate episodes of IDH-DS. Episode 1 occurred on days 23-24 of treatment cycle 1; signs and symptoms included febrile neutropenia (CTCAE grade 3), respiratory failure (grade 4), and peripheral edema (grade 1). The patient received IV dexamethasone on days 24-33, and enasidenib dosing was interrupted on days 25 and 26. The patient had stable disease at the cycle 2, day 1 response assessment. The second IDH-DS episode occurred between days 53-68 of treatment, when the patient presented with dyspnea (grade 1), fever (grade 2), and leukocytosis (grade 2); he received dexamethasone, and hydroxyurea for elevated WBC count. Enasidenib dosing was interrupted between days 54-58. At the cycle 3 response assessment, the patient had attained CRp. The third IDH-DS occurred between study days 79-85, 11 days after the patient's enasidenib dose had been doubled to 200-mg/day, with unexplained fever (grade 3) as the primary symptom. Dexamethasone was administered between days 80-101, along with hydroxyurea for elevated WBC count on days 78-85, with no enasidenib dosing interruption. CRp was sustained through cycle 8 (day 225), after which the patient experienced disease relapse but remained on-study due to potential for continued clinical benefit. His total duration of enasidenib treatment was 335 days.

**eFigure 2. Case 2: Clinical and Laboratory Profiles for a Patient With Enasidenib-Induced IDH-DS With Sustained Stable Disease**

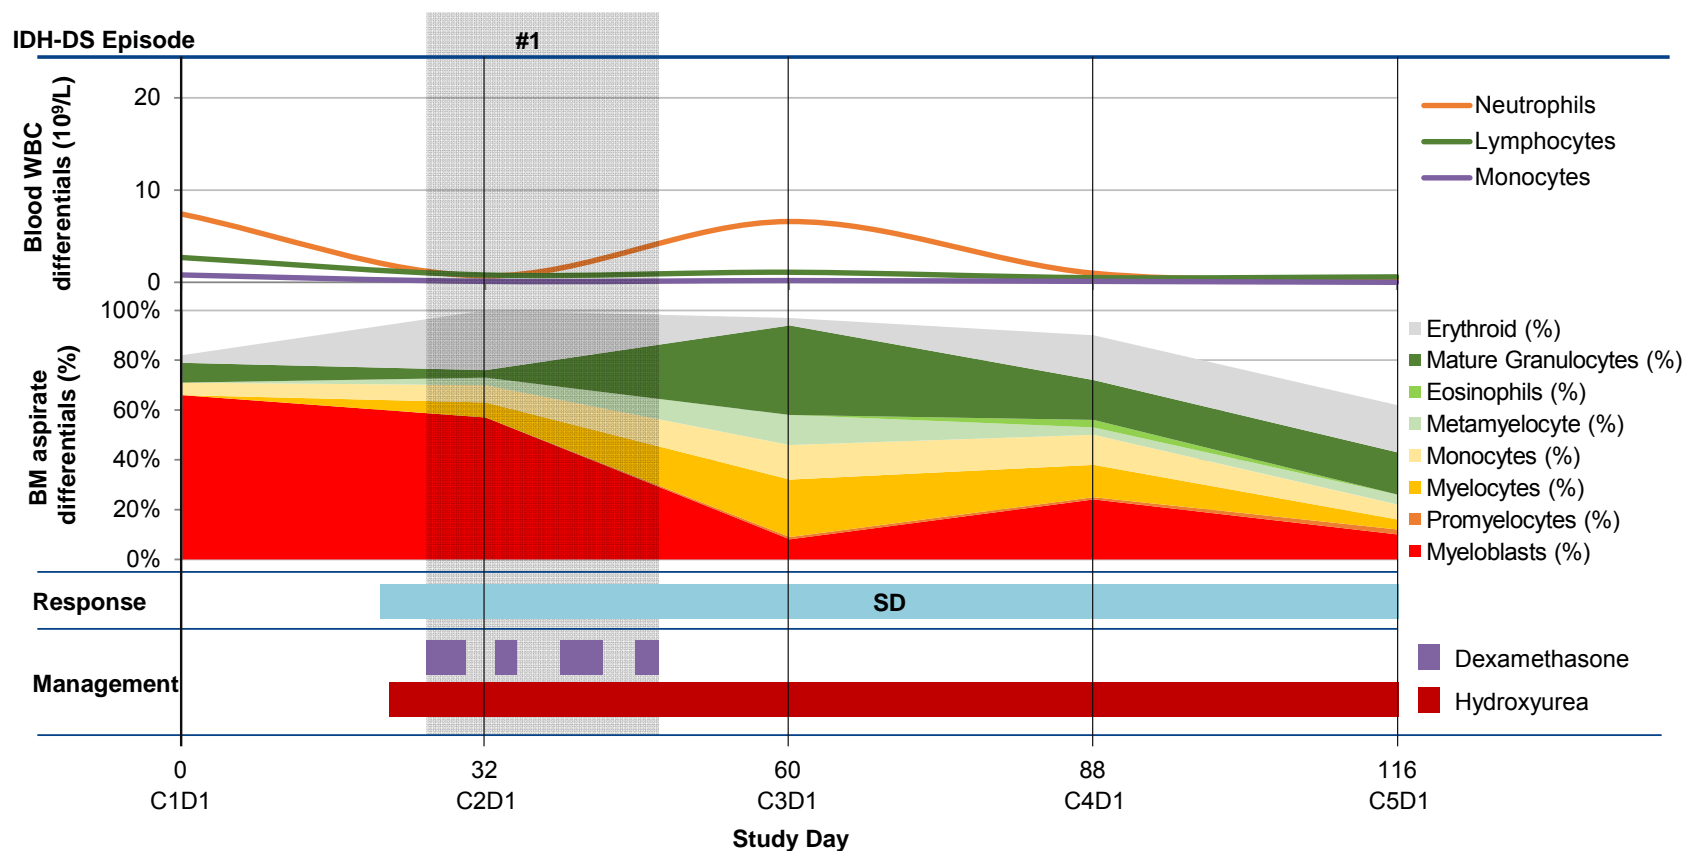

**Case 2:** A 74-year-old female with cytogenetically normal AML and co-occurring NPM1 mutation, who had relapsed after attaining first remission following induction chemotherapy, received enasidenib 50-mg BID in the dose-escalation phase of the study. Between days 26-30 of enasidenib treatment, the patient was reported to have experienced retinoic acid syndrome (grade 2); concurrent signs and symptoms included renal failure (grade 2), pyrexia (grade 2), bone pain (grade 2), exertional dyspnea (grade 1), and leukocytosis (grade 2). Enasidenib treatment was not interrupted. The patient was treated intermittently with oral and IV dexamethasone 10 mg BID on days 26 through 48. She had been receiving hydroxyurea for 4 days before IDH-DS onset (day 22) and continued to receive it after IDH-DS had resolved. Following resolution of IDH-DS, bone marrow blasts decreased to between 8-24%, but did not reach the threshold for an IWG-defined response. The patient maintained stable disease at all response assessments until day 175. On day 175, the patient showed evidence of disease progression, confirmed by a bone marrow biopsy with 59% myeloblasts. Treatment with enasidenib was discontinued.
